# Supplementary material
Source: publisher figshare collection journal article supplement (https://frontiersin.figshare.com/ndownloader/files/21845352)
Supplement: Supplementary file 1 [file 21845352]

| Sampling | Accession numbers | | | | | | | | | | |
| --- | --- | --- | --- | --- | --- | --- | --- | --- | --- | --- | --- |
| Taxon | *psb*A-*trn*H | *trn*L-*trn*F | *trn*S*-trn*G | *psb*M-*trn*D | *PHY*P | *RPB1* | *HZP* | *AC3* | *F3H* | *SAMS* | *GTP* |
| *Cycas aculeata* | KP117150 | KP117204 | KX181997 | KX182668 | KP117123 | KP117177 | KX182454 | KX182098 | KX183085 | KX182963 | KX182336 |
| *Cycas aenigma* | KX182220 | KX182575 | KX181998 | KX182669 | KX182767 | KX182864 | KX182455 | KX182099 | KX183086 | KX182964 | KX182337 |
| *Cycas angulata* | KX182221 | KT991437 | KT991499 | KT991446 | KT991461 | KT991479 | KX182456 | KX182100 | KX183087 | KX182965 | KF309336 |
| *Cycas armstrongii* | KX182222 | KX182576 | KX181999 | KX182670 | KX182768 | KX182865 | KX182457 | - | KX183088 | KX182966 | KX182338 |
| *Cycas apoa* | KX182223 | KX182577 | KX182000 | KX182671 | KX182769 | KX182866 | KX182458 | KX182101 | KX183089 | KX182967 | KX182339 |
| *Cycas arnhemica ssp.muninga* | KX182224 | KX182578 | KX182001 | KX182672 | KX182770 | KX182867 | KX182459 | KX182102 | KX183090 | KX182968 | KX182340 |
| *Cycas balansae* | KX182225 | KX182579 | KX182002 | KX182673 | KX182771 | KX182868 | KX182460 | KX182103 | KX183091 | KX182969 | KX182341 |
| *Cycas brachycantha* | KX182226 | KX182580 | KX182003 | KX182674 | KX182772 | KX182869 | KX182461 | KX182104 | KX183092 | KX182970 | KX182342 |
| *Cycas badensis* | KX182227 | KX182581 | KX182004 | KX182675 | KX182773 | KX182870 | KX182462 | KX182105 | KX183093 | KX182971 | KX182343 |
| *Cycas bougainvilleana* | KX182228 | KT991438 | KT991500 | KT991447 | KT991462 | KT991480 | KX182463 | KX182106 | KX183094 | KX182972 | KX182344 |
| *Cycas bifida* | KX182229 | KX182582 | KX182005 | KX182676 | KX182774 | KX182871 | KX182464 | KX182107 | KX183095 | KX182973 | KF309337 |
| *Cycas beddomei* | KX182230 | KX182583 | KX182006 | KX182677 | KX182775 | KX182872 | KX182465 | KX182108 | KX183096 | KX182974 | KX182345 |
| *Cycas brunnea* | KX182231 | KX182584 | KX182007 | KX182678 | KX182776 | KX182873 | KX182466 | KX182109 | KX183097 | KX182975 | KX182346 |
| *Cycas basaltica* | KX182232 | KX182585 | KX182008 | KX182679 | KX182777 | KX182874 | KX182467 | KX182110 | KX183098 | KX182976 | KX182347 |
| *Cycas calcicola* | KX182233 | KX182586 | KX182009 | KX182680 | KX182778 | KX182875 | KX182468 | KX182111 | KX183099 | KX182977 | KX182348 |
| *Cycas condaoensis* | KX182234 | GU250507 | GU250461 | GU250484 | KX182779 | KX182876 | KX182469 | KX182112 | KX183100 | KX182978 | KX182349 |
| *Cycas conferta* | KX182235 | KX182587 | KX182010 | KX182681 | KX182780 | KX182877 | - | - | - | - | KX182350 |
| *Cycas chenii* | KP117166 | KP117220 | KX182011 | KX182682 | KP117139 | KP117193 | KX182470 | KX182113 | KX183101 | KX182979 | KX182351 |
| *Cycas changjiangensis* | KX182236 | GU250520 | GU250474 | GU250497 | KX182781 | KX182878 | KX182471 | KX182114 | KX183102 | KX182980 | KX182352 |
| *Cycas chevalieri* | KX182237 | KX182588 | KX182012 | KX182683 | KX182782 | KX182879 | KX182472 | KX182115 | KX183103 | KX182981 | KX182353 |
| *Cycas chamaoensis* | KX182238 | GU250505 | KX182013 | GU250482 | KX182783 | KX182880 | KX182473 | KX182116 | KX183104 | KX182982 | KX182354 |
| *Cycas curranii* | KX182239 | KX182589 | KX182014 | KX182684 | KX182784 | KX182881 | KX182474 | KX182117 | KX183105 | KX182983 | KX182355 |
| *Cycas collina* | KX182240 | KX182590 | KX182015 | KX182685 | KX182785 | KX182882 | KX182475 | KX182118 | KX183106 | KX182984 | KX182356 |
| *Cycas campestris* | KX182241 | KX182591 | KX182016 | KX182686 | KX182786 | KX182883 | KX182476 | KX182119 | KX183107 | KX182985 | KX182357 |
| *Cycas circinalis* | KX182242 | KX182592 | KX182017 | KX182687 | KX182787 | KX182884 | KX182477 | KX182120 | KX183108 | KX182986 | KX182358 |
| *Cycas cairnsiana* | KX182243 | KX182593 | KX182018 | KX182688 | KX182788 | KX182885 | KX182478 | KX182121 | KX183109 | KX182987 | KX182359 |
| *Cycas couttsiana* | KX182244 | KX182594 | KX182019 | KX182689 | KX182789 | KX182886 | KX182479 | KX182122 | KX183110 | KX182988 | KX182360 |
| *Cycas clivicola* | KX182245 | GU250506 | GU250460 | GU250483 | KX182790 | KX182887 | KX182480 | KX182123 | KX183111 | KX182989 | KX182361 |
| *Cycas clivicola ssp.lutea* | KX182246 | KX182595 | KX182020 | KX182690 | KX182791 | KX182888 | KX182481 | KX182124 | KX183112 | KX182990 | KX182362 |
| *Cycas debaoensis* | KX182247 | KX182596 | KX182021 | KX182691 | KX182792 | KX182889 | KX182482 | KX182125 | KX183113 | KX182991 | KX182363 |
| *Cycas diannanensis* | KP117151 | KX182597 | KT991501 | KT991448 | KP117124 | KP117178 | KX182483 | KX182126 | KX183114 | KX182992 | KX182364 |
| *Cycas dolichophylla* | KP117152 | KX182598 | KX182022 | KX182692 | KX182793 | KX182890 | KX182484 | KX182127 | KX183115 | KX182993 | KX182365 |
| *Cycas desolata* | KX182248 | KX182599 | KX182023 | KX182693 | KX182794 | KX182891 | KX182485 | KX182128 | KX183116 | KX182994 | KX182366 |
| *Cycas edentata* | KX182249 | GU250513 | GU250467 | GU250490 | KT991466 | KT991484 | KX182486 | KX182129 | KX183117 | KX182995 | KX182367 |
| *Cycas elongata* | KX182250 | KX182600 | KX182024 | KX182694 | KX182795 | KX182892 | KX182487 | KX182130 | KX183118 | KX182996 | KX182368 |
| *Cycas elephantipes* | KX182251 | KX182601 | KX182025 | KX182695 | KX182796 | KX182893 | KX182488 | KX182131 | KX183119 | KX182997 | KX182369 |
| *Cycas falcata* | KX182252 | KX182602 | KX182026 | KX182696 | KX182797 | KX182894 | KX182489 | KX182132 | KX183120 | KX182998 | KX182370 |
| *Cycas furfuracea* | KX182253 | KX182603 | KX182027 | KX182697 | KX182798 | KX182895 | KX182490 | KX182133 | KX183121 | KX182999 | KX182371 |
| *Cycas fugax* | KX182254 | KT991439 | KT991502 | KT991449 | KT991467 | KT991485 | KX182491 | KX182134 | KX183122 | KX183000 | KX182372 |
| *Cycas fairylakea* | KX182255 | KX182604 | KX182028 | KX182698 | KX182799 | KX182896 | KX182492 | KX182135 | KX183123 | KX183001 | KX182373 |
| *Cycas ferruginea* | KX182256 | KX182605 | KX182029 | KX182699 | KX182800 | KX182897 | KX182493 | KX182136 | KX183124 | KX183002 | KX182374 |
| *Cycas glauca* | KX182257 | KX182606 | KX182030 | KX182700 | KX182801 | KX182898 | KX182494 | KX182137 | KX183125 | KX183003 | KX182375 |
| *Cycas guizhouensis* | KP117153 | KP117207 | KX182031 | KX182701 | KX182802 | KX182899 | KX182495 | KX182138 | KX183126 | KX183004 | KX182376 |
| *Cycas guizhouensis_thai* | KX182258 | KX182607 | KX182032 | KX182702 | KX182803 | KX182900 | - | KX182139 | KX183127 | KX183005 | KX182377 |
| *Cycas hoabinhensis* | KX182259 | KX182608 | KX182033 | KX182703 | KX182804 | KX182901 | KX182496 | KX182140 | KX183128 | KX183006 | KX182378 |
| *Cycas hongheensis* | KX182260 | KT991444 | KT991512 | KT991459 | KT991477 | KT991497 | KX182497 | KX182141 | KX183129 | KX183007 | KX182379 |
| *Cycas hongheensis2* | KX182261 | KT991445 | KT991513 | KT991460 | KT991478 | KT991498 | KX182498 | KX182142 | KX183130 | KX183008 | - |
| *Cycas hainanensis* | KX182262 | GU250521 | GU250475 | GU250498 | KX182805 | KX182902 | KX182499 | KX182143 | KX183131 | KX183009 | KX182380 |
| *Cycas indica* | KX182263 | KX182609 | KX182034 | KX182704 | KX182806 | KX182903 | KX182500 | KX182144 | KX183132 | KX183010 | KX182381 |
| *Cycas inermis* | KX182264 | KX182610 | KX182035 | KX182705 | KX182807 | KX182904 | KX182501 | KX182145 | KX183133 | KX183011 | KX182382 |
| *Cycas javana* | KX182265 | KX182611 | KX182036 | KX182706 | KX182808 | KX182905 | KX182502 | KX182146 | KX183134 | KX183012 | KX182383 |
| *Cycas lacrimans* | KX182266 | KX182612 | KX182037 | KX182707 | KX182809 | KX182906 | KX182503 | KX182147 | KX183135 | KX183013 | KX182384 |
| *Cycas laotica* | KX182267 | KX182613 | KX182038 | KX182708 | KX182810 | KX182907 | KX182504 | KX182148 | KX183136 | KX183014 | KX182385 |
| *Cycas lindstromii* | KX182268 | GU250509 | GU250463 | GU250486 | KX182811 | KX182908 | KX182505 | KX182149 | KX183137 | KX183015 | KX182386 |
| *Cycas longipetiolula* | KX182269 | KX182614 | KX182039 | KX182709 | KX182812 | KX182909 | KX182506 | KX182150 | KX183138 | KX183016 | KX182387 |
| *Cycas lane-poolei* | KX182270 | KX182615 | KX182040 | KX182710 | KX182813 | KX182910 | KX182507 | KX182151 | KX183139 | KX183017 | KX182388 |
| *Cycas lingshuiensis* | KX182271 | KX182616 | KX182041 | KX182711 | KX182814 | KX182911 | KX182508 | KX182152 | KX183140 | KX183018 | KX182389 |
| *Cycas litoralis* | KX182272 | KX182617 | KX182042 | KX182712 | KX182815 | KX182912 | KX182509 | KX182153 | KX183141 | KX183019 | KX182390 |
| *Cycas macrocarpa* | KX182273 | KX182618 | KX182043 | KX182713 | KX182816 | KX182913 | KX182510 | KX182154 | KX183142 | KX183020 | - |
| *Cycas macrocarpa3* | KX182274 | KX182619 | KX182044 | KX182714 | KX182817 | KX182914 | KX182511 | KX182155 | KX183143 | KX183021 | KX182391 |
| *Cycas media ssp.media* | KX182275 | KX182620 | KX182045 | KX182715 | KX182818 | KX182915 | KX182512 | KX182156 | KX183144 | KX183022 | KX182392 |
| *Cycas media ssp.banksii* | KX182276 | KX182621 | KX182046 | KX182716 | KX182819 | KX182916 | KX182513 | KX182157 | KX183145 | KX183023 | KX182393 |
| *Cycas media ssp.ensata* | KX182277 | KX182622 | KX182047 | KX182717 | KX182820 | KX182917 | KX182514 | KX182158 | KX183146 | KX183024 | KX182394 |
| *Cycas multifrondis* | KX182278 | KX182623 | KX182048 | KX182718 | KX182821 | KX182918 | KX182515 | KX182159 | KX183147 | KX183025 | KX182395 |
| *Cycas megacarpa* | KX182279 | KX182624 | KX182049 | KX182719 | KX182822 | KX182919 | KX182516 | KX182160 | KX183148 | KX183026 | KX182396 |
| *Cycas micholitzii* | KX182280 | KX182625 | KX182050 | KX182720 | KX182823 | KX182920 | KX182517 | KX182161 | KX183149 | KX183027 | KX182397 |
| *Cycas maconichie ssp.lanata* | KX182281 | KX182626 | KX182051 | KX182721 | KX182824 | KX182921 | KX182518 | KX182162 | KX183150 | KX183028 | KX182398 |
| *Cycas maconochiei ssp.maconichiei* | KX182282 | KX182627 | KX182052 | KX182722 | KX182825 | KX182922 | KX182519 | KX182163 | KX183151 | KX183029 | KX182399 |
| *Cycas maconichie ssp.viridis* | KX182283 | KX182628 | KX182053 | KX182723 | KX182826 | KX182923 | KX182520 | KX182164 | KX183152 | KX183030 | KX182400 |
| *Cycas multiovula* | KX182284 | KX182629 | KX182054 | KX182724 | KX182827 | KX182924 | KX182521 | KX182165 | KX183153 | KX183031 | KX182401 |
| *Cycas multipinnata* | KX182285 | KP117209 | KX182055 | KX182725 | KX182828 | KX182925 | KX182522 | KX182166 | KX183154 | KX183032 | KX182402 |
| *Cycas miquelii* | KX182286 | KX182630 | KX182056 | KX182726 | KX182829 | KX182926 | - | KX182167 | KX183155 | - | - |
| *Cycas micronesica* | KX182287 | KX182631 | KX182057 | KX182727 | KX182830 | KX182927 | KX182523 | KX182168 | KX183156 | KX183033 | KX182403 |
| *Cycas montana* | KX182288 | KX182632 | KX182058 | KX182728 | KX182831 | KX182928 | KX182524 | KX182169 | KX183157 | KX183034 | KX182404 |
| *Cycas nathorstii* | KX182289 | KX182633 | KX182059 | KX182729 | KX182832 | KX182929 | KX182525 | KX182170 | KX183158 | KX183035 | KX182405 |
| *Cycas nitida* | KX182290 | KX182634 | KX182060 | KX182730 | KX182833 | KX182930 | KX182526 | KX182171 | KX183159 | KX183036 | KX182406 |
| *Cycas nongnoochiae* | KX182291 | KX182635 | KX182061 | KX182731 | KT991468 | KT991486 | KX182527 | KX182172 | KX183160 | KX183037 | KX182407 |
| *Cycas nongnoochiae2* | KX182292 | KX182636 | KX182062 | KX182732 | KX182834 | KX182931 | KX182528 | KX182173 | KX183161 | KX183038 | - |
| *Cycas ophiolitica* | KX182293 | KT991440 | KT991504 | KT991451 | KT991469 | KT991487 | KX182529 | KX182174 | KX183162 | KX183039 | KX182408 |
| *Cycas orientis* | KX182294 | KX182637 | KX182063 | KX182733 | KX182835 | KX182932 | KX182530 | KX182175 | KX183163 | KX183040 | KX182409 |
| *Cycas pachypoda* | KX182295 | KT991441 | KT991505 | KT991452 | KT991470 | KT991488 | KX182531 | KX182176 | KX183164 | KX183041 | KX182410 |
| *Cycas pectinata* | KP117156 | KP117210 | KT991506 | KT991453 | KP117129 | KP117183 | KX182532 | KX182177 | KX183165 | KX183042 | KX182411 |
| *Cycas platyphylla* | KX182296 | KX182638 | KX182064 | KX182734 | KX182836 | KX182933 | KX182533 | KX182178 | KX183166 | KX183043 | KX182412 |
| *Cycas pruinosa* | KX182297 | KX182639 | KX182065 | KX182735 | KX182837 | KX182934 | KX182534 | KX182179 | KX183167 | KX183044 | KX182413 |
| *Cycas papuana* | KX182298 | KX182640 | KX182066 | KX182736 | KX182838 | KX182935 | KX182535 | KX182180 | KX183168 | KX183045 | KX182414 |
| *Cycas pranburiensis* | KX182299 | KX182641 | KX182067 | KX182737 | KX182839 | KX182936 | KX182536 | KX182181 | KX183169 | KX183046 | KX182415 |
| *Cycas petraea* | KX182300 | KT991442 | KT991507 | KT991454 | KT991471 | KT991489 | KX182537 | KX182182 | KX183170 | KX183047 | - |
| *Cycas petraea3* | KX182301 | KX182642 | KX182068 | KX182738 | KX182840 | KX182937 | KX182538 | KX182183 | KX183171 | KX183048 | KX182416 |
| *Cycas parvula* | KP117158 | KP117212 | KX182069 | KX182739 | KP117131 | KP117185 | KX182539 | KX182184 | KX183172 | KX183049 | KX182417 |
| *Cycas panzhihuaensis* | KP117157 | KP117211 | KT991508 | KT991455 | KP117130 | KP117184 | KX182540 | KX182185 | KX183173 | KX183050 | KX182418 |
| *Cycas riuminiana* | KX182302 | KX182643 | KX182070 | KX182740 | KX182841 | KX182938 | KX182541 | KX182186 | KX183174 | KX183051 | KX182419 |
| *Cycas rumphii* | KX182303 | KX182644 | KX182071 | KX182741 | KX182842 | KX182939 | KX182542 | KX182187 | KX183175 | KX183052 | KX182420 |
| *Cycas revoluta* | KP117159 | GQ273656 | AB434465 | GQ273612 | KP117132 | KP117186 | KX182543 | KX182188 | KX183176 | KX183053 | KX182421 |
| *Cycas siamensis* | KP117160 | GU250511 | GU250465 | GU250488 | KP117133 | KP117187 | KX182544 | KX182189 | KX183177 | KX183054 | KX182422 |
| *Cycas sundaica* | KX182304 | KX182645 | KX182072 | KX182742 | KX182843 | KX182940 | KX182545 | KX182190 | KX183178 | KX183055 | KX182423 |
| *Cycas seemannii* | KX182305 | GU250516 | GU250470 | GU250493 | KT991472 | KT991490 | KX182546 | KX182191 | KX183179 | KX183056 | KX182424 |
| *Cycas segmentifida* | KX182306 | GU250523 | GU250477 | GU250500 | KX182844 | KX182941 | KX182547 | KX182192 | KX183180 | KX183057 | KX182425 |
| *Cycas schumanniana* | KX182307 | KX182646 | KX182073 | KX182743 | KX182845 | KX182942 | KX182548 | KX182193 | KX183181 | KX183058 | - |
| *Cycas schumanniana2* | KX182308 | KX182647 | KX182074 | KX182744 | KX182846 | KX182943 | KX182549 | KX182194 | KX183182 | KX183059 | KX182426 |
| *Cycas simplicipinna* | KX182309 | KX182648 | KX182075 | KX182745 | KX182847 | KX182944 | KX182550 | KX182195 | KX183183 | KX183060 | KX182427 |
| *Cycas sancti-lasallei* | KX182310 | KX182649 | KX182076 | KX182746 | KX182848 | KX182945 | KX182551 | KX182196 | KX183184 | KX183061 | KX182428 |
| *Cycas semota* | KX182311 | KX182650 | KX182077 | KX182747 | KX182849 | KX182946 | KX182552 | KX182197 | KX183185 | KX183062 | KX182429 |
| *Cycas sphaerica* | KX182312 | KX182651 | KX182078 | KX182748 | KX182850 | KX182947 | KX182553 | KX182198 | KX183186 | KX183063 | KX182430 |
| *Cycas scratchleyana* | KX182313 | KX182652 | KX182079 | KX182749 | KX182851 | KX182948 | KX182554 | KX182199 | KX183187 | KX183064 | KX182431 |
| *Cycas silvestris* | KP117161 | KP117215 | KX182080 | KX182750 | KP117134 | KP117188 | KX182555 | KX182200 | KX183188 | KX183065 | KX182432 |
| *Cycas shiwandashanica* | KX182314 | KX182653 | KX182081 | KX182751 | KX182852 | KX182949 | KX182556 | KX182201 | KX183189 | KX183066 | KX182433 |
| *Cycas sexseminifera* | KX182315 | GU250524 | GU250478 | GU250501 | KX182853 | KX182950 | KX182557 | KX182202 | KX183190 | KX183067 | - |
| *Cycas sexseminifera3* | KX182316 | KX182654 | KX182082 | KX182752 | KX182854 | KX182951 | KX182558 | KX182203 | KX183191 | KX183068 | KX182434 |
| *Cycas shanyaensis* | KX182317 | KX182655 | KX182083 | KX182753 | KX182855 | KX182952 | KX182559 | KX182204 | KX183192 | KX183069 | KX182435 |
| *Cycas szechuanensis* | KP117163 | KP117217 | KX182084 | KX182754 | KP117136 | KP117190 | KX182560 | KX182205 | KX183193 | KX183070 | KX182436 |
| *Cycas taitungensis* | KX182318 | GU250502 | KX182085 | GU250479 | KT991473 | KT991491 | KX182561 | KX182206 | KX183194 | KX183071 | KX182437 |
| *Cycas thouarsii* | KX182319 | GU250517 | GU250471 | GU250494 | KX182856 | KX182953 | KX182562 | KX182207 | KX183195 | KX183072 | KX182438 |
| *Cycas tuckeri* | KX182320 | KT991443 | KT991510 | KT991457 | KT991474 | KT991492 | KX182563 | KX182208 | KX183196 | KX183073 | KX182439 |
| *Cycas tropophylla* | KP117165 | KP117219 | KX182086 | KX182755 | KP117138 | KP117192 | KX182564 | KX182209 | KX183197 | KX183074 | KX182440 |
| *Cycas tanqingii* | KP117164 | KX182656 | KT991511 | KT991458 | KP117137 | KP117191 | KX182565 | KX182210 | KX183198 | KX183075 | KX182441 |
| *Cycas truncata* | KX182321 | KX182657 | KX182087 | KX182756 | KX182857 | KX182954 | KX182566 | KX182211 | KX183199 | KX183076 | KX182442 |
| *Cycas tansachana* | KX182322 | GU250512 | GU250466 | GU250489 | KT991475 | KT991493 | KX182567 | KX182212 | KX183200 | KX183077 | KX182443 |
| *Cycas taiwaniana* | KX182323 | KX182658 | KX182088 | KX182757 | KX182858 | KX182955 | KX182568 | KX182213 | KX183201 | KX183078 | KX182444 |
| *Cycas vespertilio* | KX182324 | KX182659 | KX182089 | KX182758 | KX182859 | KX182956 | KX182569 | KX182214 | KX183202 | KX183079 | KX182445 |
| *Cycas wadei* | KX182325 | GU250504 | GU250458 | GU250481 | KT991476 | KT991494 | KX182570 | KX182215 | KX183203 | KX183080 | KX182446 |
| *Cycas xipholepis* | KX182326 | KX182660 | KX182090 | KX182759 | KX182860 | KX182957 | KX182571 | KX182216 | KX183204 | KX183081 | KX182447 |
| *Cycas yorkiana* | KX182327 | KX182661 | KX182091 | KX182760 | KX182861 | KX182958 | KX182572 | KX182217 | KX183205 | KX183082 | KX182448 |
| *Cycas zambalensis* | KX182328 | KX182662 | KX182092 | KX182761 | KX182862 | KX182959 | KX182573 | KX182218 | KX183206 | KX183083 | KX182449 |
| *Cycas zeylanica* | KX182329 | GU250518 | GU250472 | GU250495 | KX182863 | KX182960 | KX182574 | KX182219 | KX183207 | KX183084 | KX182450 |
| *Bowenia sp* | JX402774 | AF531185 | AY138203 | JX402774 | JN655955 | - | - | - | - | - | KF309332 |
| *Ceratozamia sp* | KX182330 | KX182663 | KX182093 | KX182762 | JN655968 | - | - | - | - | - | KX182451 |
| *Dioon sp* | KX182331 | GQ273655 | AB434427 | GQ273609 | JN655970 | - | - | - | - | - | KF309338 |
| *Encephalartos sp* | KX182332 | KX182664 | KX182094 | KX182763 | JN656000 | - | - | - | - | - | KX182452 |
| *Lepidozamia sp* | KX182333 | KX182665 | KX182095 | KX182764 | JN656029 | KX182961 | - | - | - | - | KF309343 |
| *Macrozamia sp* | KX182334 | KX182666 | KX182096 | KX182765 | JN656044 | - | - | - | - | - | KF309345 |
| *Microcycas calocoma* | - | AF531194 | AB434461 | GQ273604 | JN656055 | - | - | - | - | - | KF309346 |
| *Stangeria eriopus* | JX416858 | AF531184 | AB434424 | JX416858 | JN656056 | KX182962 | - | - | - | - | KF309347 |
| *Zamia sp* | KX182335 | KX182667 | KX182097 | KX182766 | JN656065 | - | - | - | - | - | KX182453 |
| *Ginkgo biloba* | JN867578 | JN867578 | GQ227504 | JN867578 | KT071989 | AY490553 | DQ657216 | - | AY742228 | JF519742 | - |
